# Supplementary material
Source: PubMed Central journal article supplement (PMC3947305)
Supplement: NIHMS538381-supplement-1.pdf [file NIHMS538381-supplement-1.pdf]

# Supplementary Tables

## Supplementary Table 1

Tumor incidence and latency in MMTV-HA-14-3-3 $\zeta$  transgenic and wild type mice.

|                        | No. of mice | Tumor incidence | Mean tumor latency             |
|------------------------|-------------|-----------------|--------------------------------|
| Wild type              | 20          | 0 (0%)          | Not applicable                 |
| MMTV-HA-14-3-3 $\zeta$ | 24          | 8 (33.3%)       | 662 $\pm$ 75<br>(497~723 days) |

## Supplementary Table 2

Mammary tumor histology and latency in female MMTV-HA-14-3-3 $\zeta$  transgenic mice

| Mice No | Mammary tumor histology                              | Lung Metastasis | Tumor latency (days) | Line    |
|---------|------------------------------------------------------|-----------------|----------------------|---------|
| 440     | Invasive ductal carcinoma                            | -               | 720                  | MM2-833 |
| 1212    | Invasive papillary carcinoma                         | -               | 631                  | MM2-833 |
| 772     | Invasive ductal carcinoma                            | -               | 650                  | MM2-833 |
| 1268    | Invasive carcinoma                                   | -               | 712                  | MM3-20  |
| 1261    | Invasive carcinoma                                   | +               | 711                  | MM3-20  |
| 83      | Invasive ductal carcinoma with metaplastic carcinoma | -               | 659                  | MM3-20  |
| 82      | Invasive ductal carcinoma                            | -               | 497                  | MM3-20  |
| 1273    | Invasive ductal carcinoma                            | -               | 723                  | MM3-20  |

Multiparous (3-4 pregnancies) MMTV-HA-14-3-3 $\zeta$  transgenic female mice (MM3-20 and MM2-833 lines) were analyzed for tumor histology, metastasis and latency.

### Supplementary Table 3A

| Tumor grade | 14-3-3 $\zeta$ positive (%) |
|-------------|-----------------------------|
| 0           | 30 (15.8)                   |
| 1+          | 31 (16.3)                   |
| 2+          | 58 (30.5)                   |
| 3+          | 71 (37.4)                   |

### Supplementary Table 3B

|                                            | Tumor grade |         |         |         | <i>p-value</i> |
|--------------------------------------------|-------------|---------|---------|---------|----------------|
|                                            | 0 (%)       | 1(%)    | 2(%)    | 3(%)    |                |
| <u>14-3-3<math>\zeta</math> expression</u> |             |         |         |         |                |
| 0 / 1+                                     | 22 (81.5)   | 1 (2)   | 6 (10)  | 1 (2)   | <0.001         |
| 2+ / 3+                                    | 5 (18.5)    | 46 (98) | 54 (90) | 55 (98) |                |

### Supplementary Table 3C

|                         | Tumor grade |         |         |         | <i>p-value</i> |
|-------------------------|-------------|---------|---------|---------|----------------|
|                         | 0 (%)       | 1(%)    | 2(%)    | 3(%)    |                |
| <u>ErbB2 expression</u> |             |         |         |         |                |
| 0 / 1+                  | 24 (100)    | 31 (66) | 37 (62) | 38 (68) | <0.001         |
| 2+ / 3+                 | 0 (0)       | 16 (34) | 23 (38) | 10 (32) |                |

### Supplementary Table 3D

miR-221 correlation with 14-3-3 and Ki-67 expression in human TMA containing normal and breast tumor tissues.

| Marker                                     | miR-221 expression |           | <i>p-value</i> |
|--------------------------------------------|--------------------|-----------|----------------|
|                                            | Low (%)            | High (%)  |                |
| <u>14-3-3<math>\zeta</math> expression</u> |                    |           |                |
| Low                                        | 50 (56.8)          | 38 (43.2) | <0.01          |
| High                                       | 39 (38.2)          | 63 (61.8) |                |
| <u>Ki-67 positive</u>                      |                    |           |                |
| Low                                        | 66 (74.2)          | 54 (53.5) | <0.01          |
| High                                       | 23 (25.8)          | 47 (46.5) |                |

### Supplementary Table 3 - TMA Analysis

3A, Percentage of 14-3-3 $\zeta$  positive patients by Tumor grade. 3B, Bivariate analysis of 14-3-3 $\zeta$  status versus grade. 3C, Bivariate analysis of ErbB2 status versus grade. 3D, Analysis of miR-221 association with 14-3-3 $\zeta$  and Ki-67. All data are number of cores and percent of positive staining in the corresponding group (%). *P* value was determined by Chi-square analysis. Scores are defined as follows: 14-3-3 $\zeta$  score low = 0, 1+, high = 2+, 3+; miR-221 score low = 0, high = 1+, 2+, 3+ and Ki-67 low = <20% positive, high = >20% positive.

## Supplementary Table 4

Confusion matrix of SVM using the indicated markers of the 14-3-3 $\zeta$ /miR-221/p27/Ki-67 axis as the input variables (columns: records; rows: predictions)

| Predicted Tumor Grade                             | Actual Tumor grade |          |           |
|---------------------------------------------------|--------------------|----------|-----------|
|                                                   | Grade 0            | Grade 1  | Grade 2/3 |
| <u>14-3-3<math>\zeta</math></u>                   |                    |          |           |
| Grade 0                                           | <b>4</b>           | 1        | 4         |
| Grade 1                                           | 2                  | <b>1</b> | 3         |
| Grade 2/3                                         | 0                  | 6        | <b>16</b> |
| <u>miR-221</u>                                    |                    |          |           |
| Grade 0                                           | <b>0</b>           | 1        | 5         |
| Grade 1                                           | 2                  | <b>4</b> | 12        |
| Grade 2/3                                         | 4                  | 3        | <b>6</b>  |
| <u>p27</u>                                        |                    |          |           |
| Grade 0                                           | <b>1</b>           | 1        | 6         |
| Grade 1                                           | 2                  | <b>4</b> | 9         |
| Grade 2/3                                         | 3                  | 3        | <b>8</b>  |
| <u>Ki-67</u>                                      |                    |          |           |
| Grade 0                                           | <b>2</b>           | 2        | 4         |
| Grade 1                                           | 3                  | <b>1</b> | 8         |
| Grade 2/3                                         | 1                  | 5        | <b>11</b> |
| <u>14-3-3<math>\zeta</math> / miR-221</u>         |                    |          |           |
| Grade 0                                           | <b>3</b>           | 1        | 2         |
| Grade 1                                           | 1                  | <b>1</b> | 4         |
| Grade 2/3                                         | 2                  | 6        | <b>17</b> |
| <u>14-3-3<math>\zeta</math> / miR-221 / p27</u>   |                    |          |           |
| Grade 0                                           | <b>3</b>           | 1        | 2         |
| Grade 1                                           | 0                  | <b>3</b> | 3         |
| Grade 2/3                                         | 3                  | 4        | <b>18</b> |
| <u>14-3-3<math>\zeta</math>/miR-221/p27/Ki-67</u> |                    |          |           |
| Grade 0                                           | <b>3</b>           | 0        | 1         |
| Grade 1                                           | 0                  | <b>5</b> | 2         |
| Grade 2/3                                         | 3                  | 3        | <b>20</b> |
