# Supplementary material
Source: PubMed Central journal article supplement (PMC3947305)
Supplement: NIHMS538381-supplement-2.pdf [file NIHMS538381-supplement-2.pdf]

# Supplementary Figure 1

## A WAP-HA-14-3-3 $\zeta$ genotyping

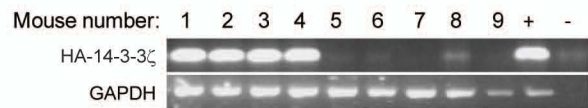

## B

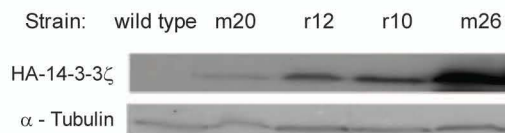

## C MMTV-HA-14-3-3 $\zeta$ genotyping

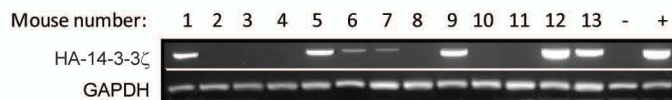

## D

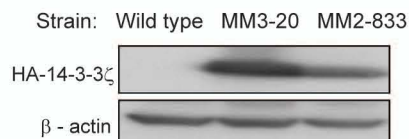

## E

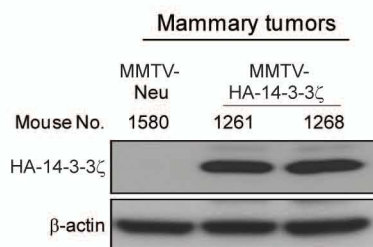

## F

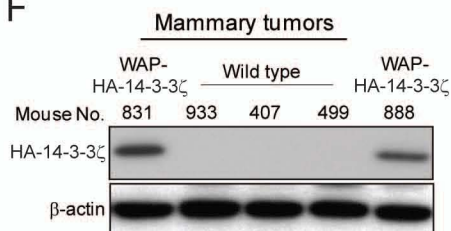

## G

### IHC with HA antibody

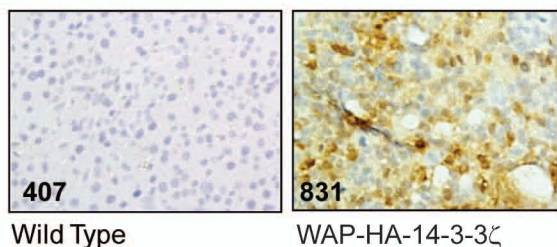

**Supplementary Figure 1: Characterization of 14-3-3 $\zeta$  Transgenic Mice and Mammary Tumors.** *A,B*, Representative PCR screening of WAP-HA-14-3-3 $\zeta$  transgenic founder mice and IB detection of HA-14-3-3 $\zeta$  protein expression in mammary glands of WAP-HA-14-3-3 $\zeta$  transgenic mice strains. *C,D*, Representative PCR screening of MMTV-HA-14-3-3 $\zeta$  transgenic founder mice and IB detection of HA-14-3-3 $\zeta$  protein expression in mammary glands of MMTV-HA-14-3-3 $\zeta$  transgenic mice strains. *E*, IB of HA-14-3-3 $\zeta$  protein expression in mammary tumors of MMTV-HA-14-3-3 $\zeta$  mice. MMTV-*neu* mouse mammary tumor serves as a negative control. *F*, IB and *G*, IHC of HA-14-3-3 $\zeta$  expression (400x magnification) in mammary tumors from DMBA-treated WAP-HA-14-3-3 $\zeta$  transgenic and wild-type mice.

# Supplementary Figure 2

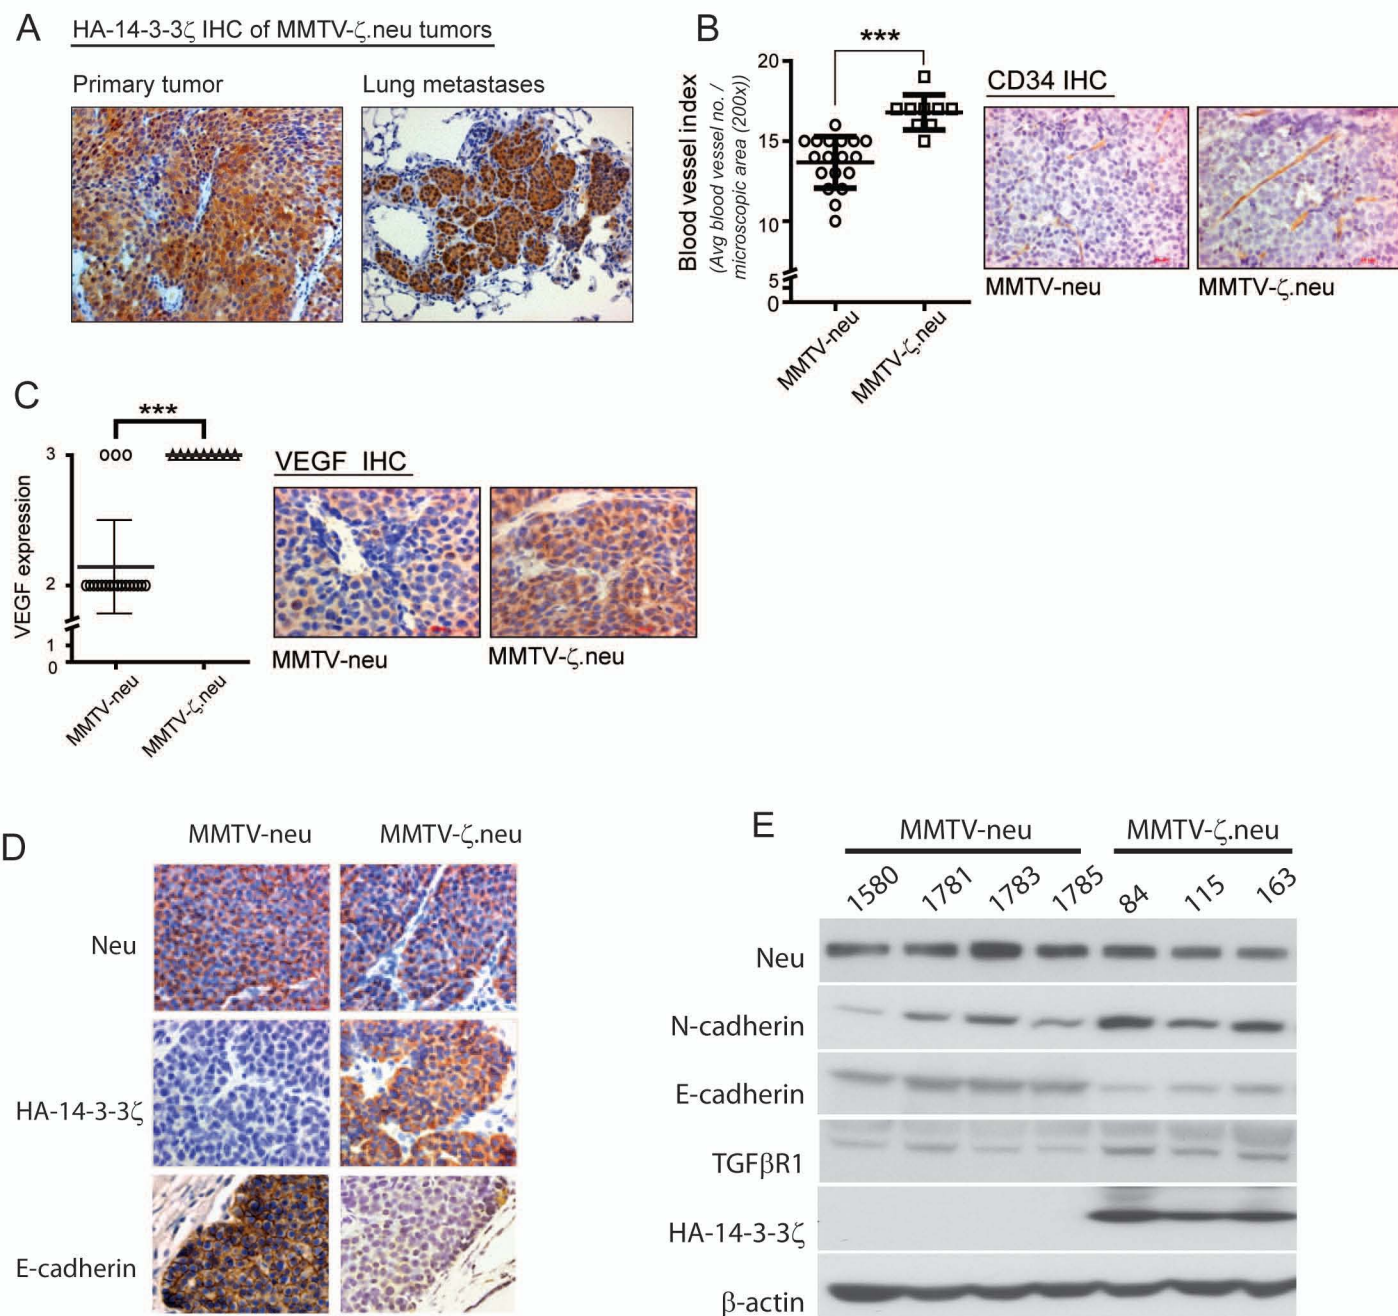

**Supplementary Figure 2: Analysis of Metastasis in Mammary Tumors.** *A*, Representative HA-14-3-3 $\zeta$  IHC (X200) of matched primary tumor and lung metastases that originated from the HA-14-3-3 $\zeta$  overexpressing tumors. *B*, Average blood vessel index (left) is higher in mammary tumors from MMTV- $\zeta$ .neu (n=9) mice than MMTV-neu (n=18) mice. Representative CD34 IHC (right, X400). *C*, Quantitative analysis (left) and representative VEGF IHC (right, X400) showed increased expression in mammary tumors of MMTV- $\zeta$ .neu mice (n=9) versus MMTV-neu mice (n=21). *D*, Representative IHC of Neu, HA-14-3-3 $\zeta$  and E-cadherin in mammary tumors of MMTV-neu and MMTV- $\zeta$ .neu mice (X400). *E*, IB of E-cadherin, N-cadherin and TGF $\beta$ 1 in mammary tumors of MMTV- $\zeta$ .neu and MMTV-neu mice indicates EMT in 14-3-3 $\zeta$  overexpressing tumors. Bars, SD. \*\*\*,  $P < 0.001$ .



A

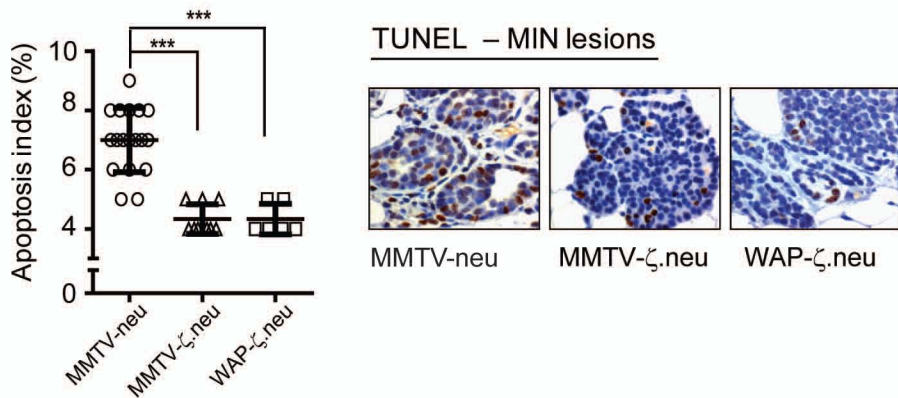

B

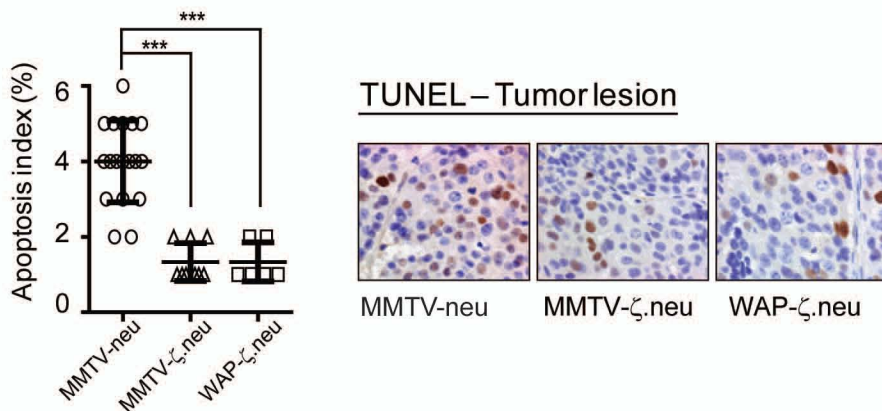

C

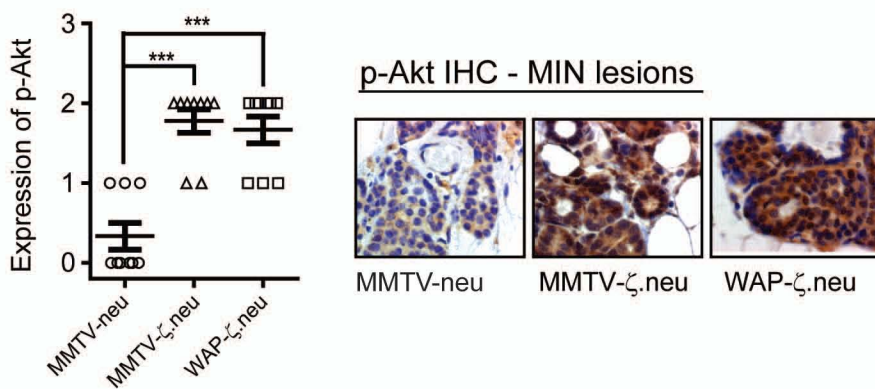

D

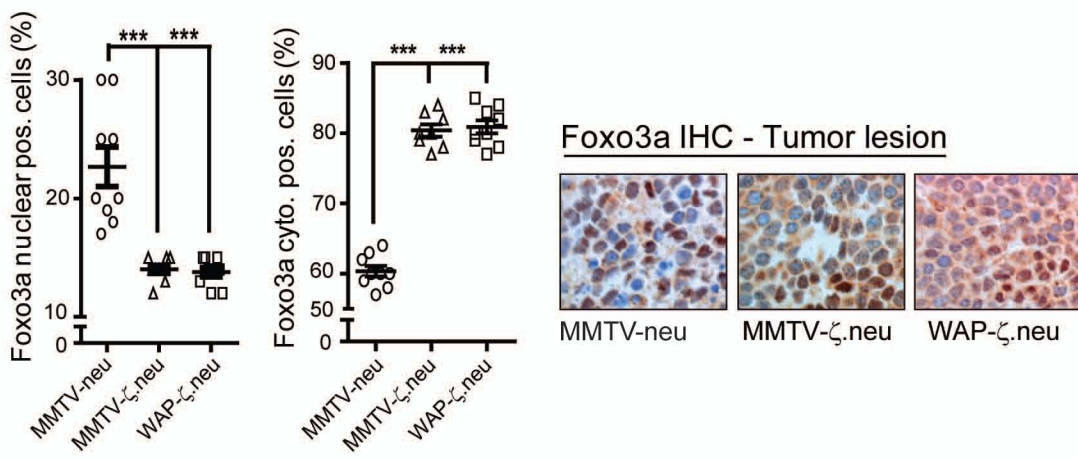

# Supplementary Figure 3 - cont'd

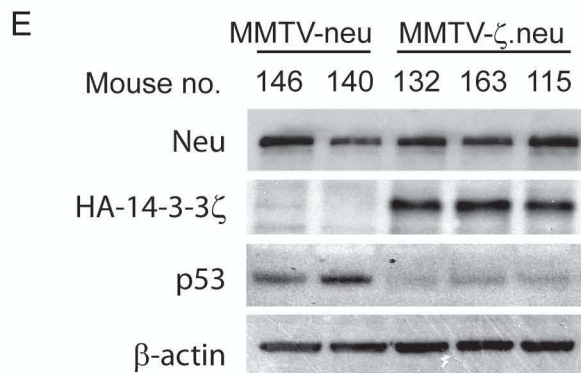

## Supplementary Figure 3: Apoptosis Assays in Transgenic Mice and Cell Lines.

**A**, Quantitative analysis (left) of the percentage of apoptotic cells by TUNEL assay and representative staining (right, X400) of MIN lesions showed significant ( $P < 0.001$ ) decrease in apoptosis in MMTV- $\zeta$ .*neu* and WAP- $\zeta$ .*neu* lesions compared to MMTV-*neu* lesions. Respectively,  $n = 18, 9, 6$ . **B**, Quantitative analysis (left) of the percentage of apoptotic cells by TUNEL assay and representative staining (right, X400) in mammary tumors showed significant ( $P < 0.001$ ) decrease in apoptosis in MMTV- $\zeta$ .*neu* and WAP- $\zeta$ .*neu* tumors compared to MMTV-*neu* tumors. Respectively,  $n = 18, 9, 6$ . **C**, Quantitative analysis (left) of p-Akt expression and representative IHC (right, X400) of MIN lesions showed significant ( $P < 0.001$ ) increase in expression in MMTV- $\zeta$ .*neu* and WAP- $\zeta$ .*neu* lesions compared to MMTV-*neu* lesions. All,  $n = 9$ . **D**, Quantitative analysis of nuclear and cytoplasmic Foxo3a expression (left) and representative IHC of mammary tumors (right, X400) showed significant increase in cytoplasmic Foxo3a localization in MMTV- $\zeta$ .*neu* and WAP- $\zeta$ .*neu* tumors compared to MMTV-*neu* tumors ( $P < 0.001$ ). All groups,  $n = 9$ . **E**, IB analysis of p53 expression shows p53 downregulation in MMTV- $\zeta$ .*neu* mammary tumors compared to MMTV-*neu* tumors. Bars, SD. \*\*\*,  $P < 0.001$ , \*\*\*\*,  $P < 0.0001$ .

# Supplementary Figure 4

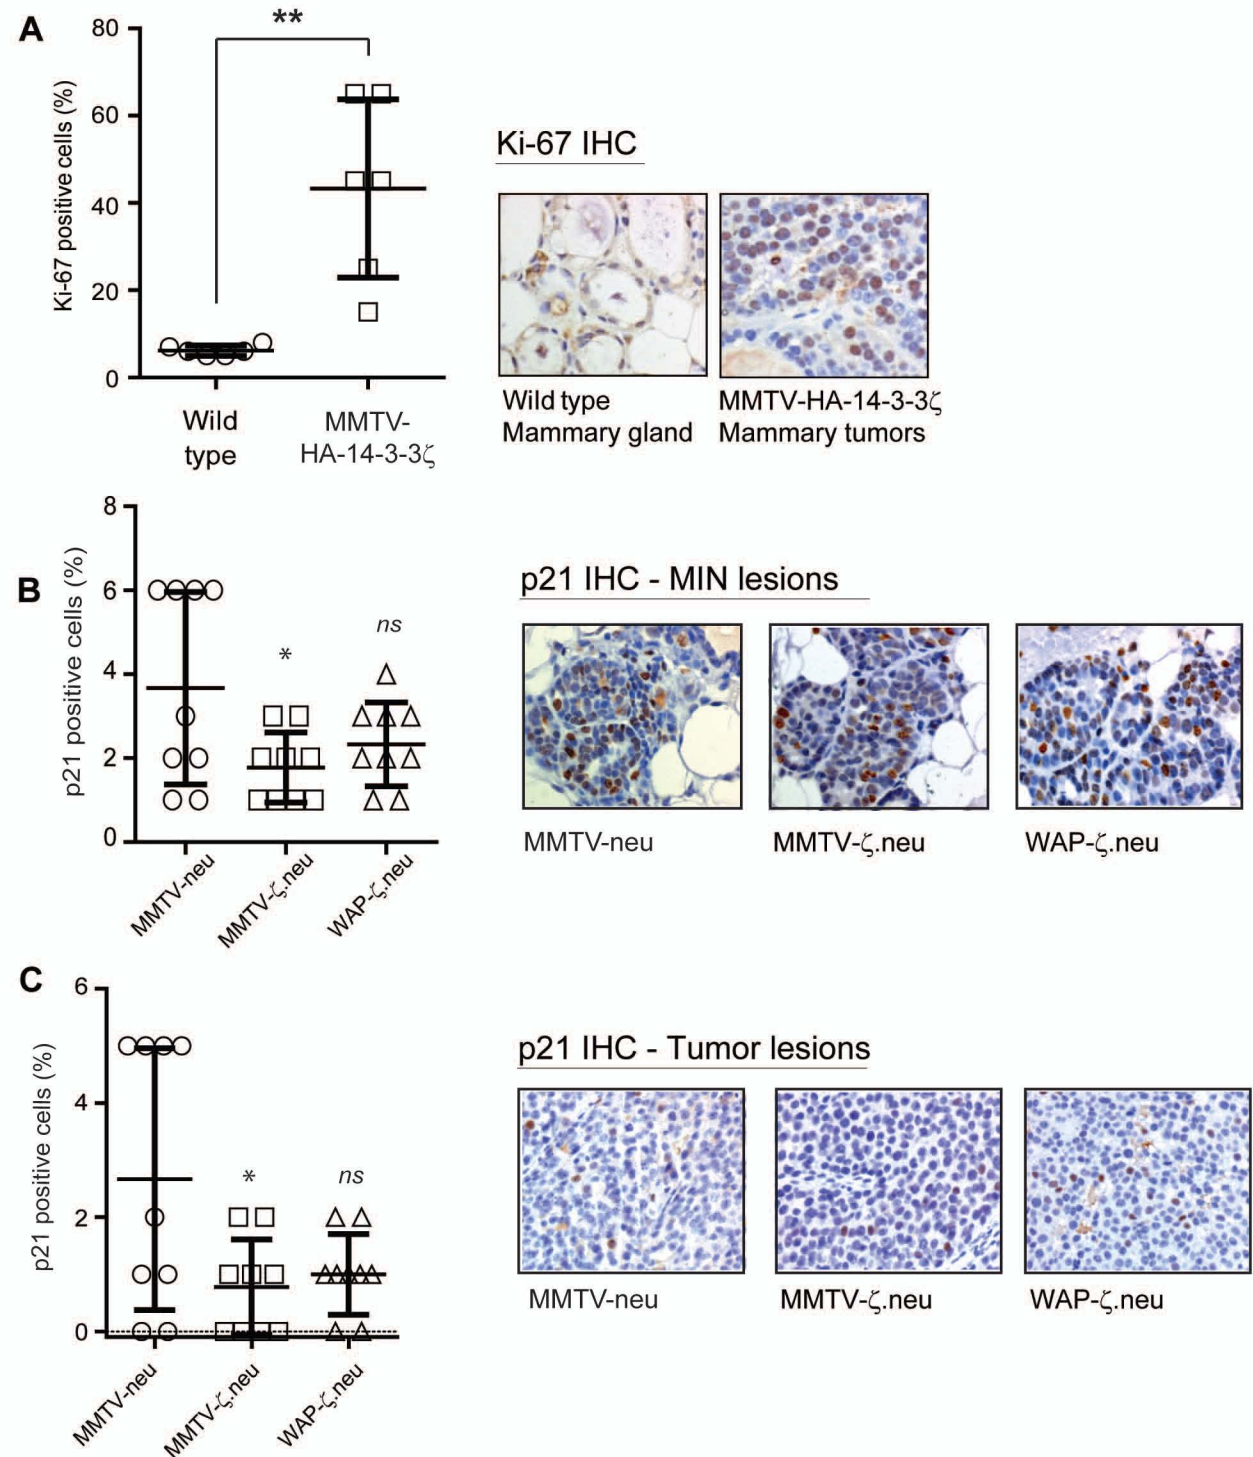

**Supplementary Figure 4: IHC Staining of Ki-67 and p21 Expression.** Quantitative analysis of Ki-67-positive nuclei (left) and representative IHC (right, X400) shows increased Ki-67 in MMTV- $\zeta$ .neu ( $P=0.004$ ) mammary tumor lesions versus  $P$  mammary gland of wildtype mice. Both,  $n=6$ . B, C, Quantitative analysis of p21 expression in MIN lesions and tumors of MMTV- $\zeta$ .neu and WAP- $\zeta$ .neu mice compared to MMTV-neu mice (left, all  $n=9$ ) with representative p21 IHC (right, X400) showed a moderate decrease in the bitransgenic mice lesions. Bars, SD. \*\*,  $P < 0.01$ , \*,  $P < 0.05$ .



# Supplementary Figure 5

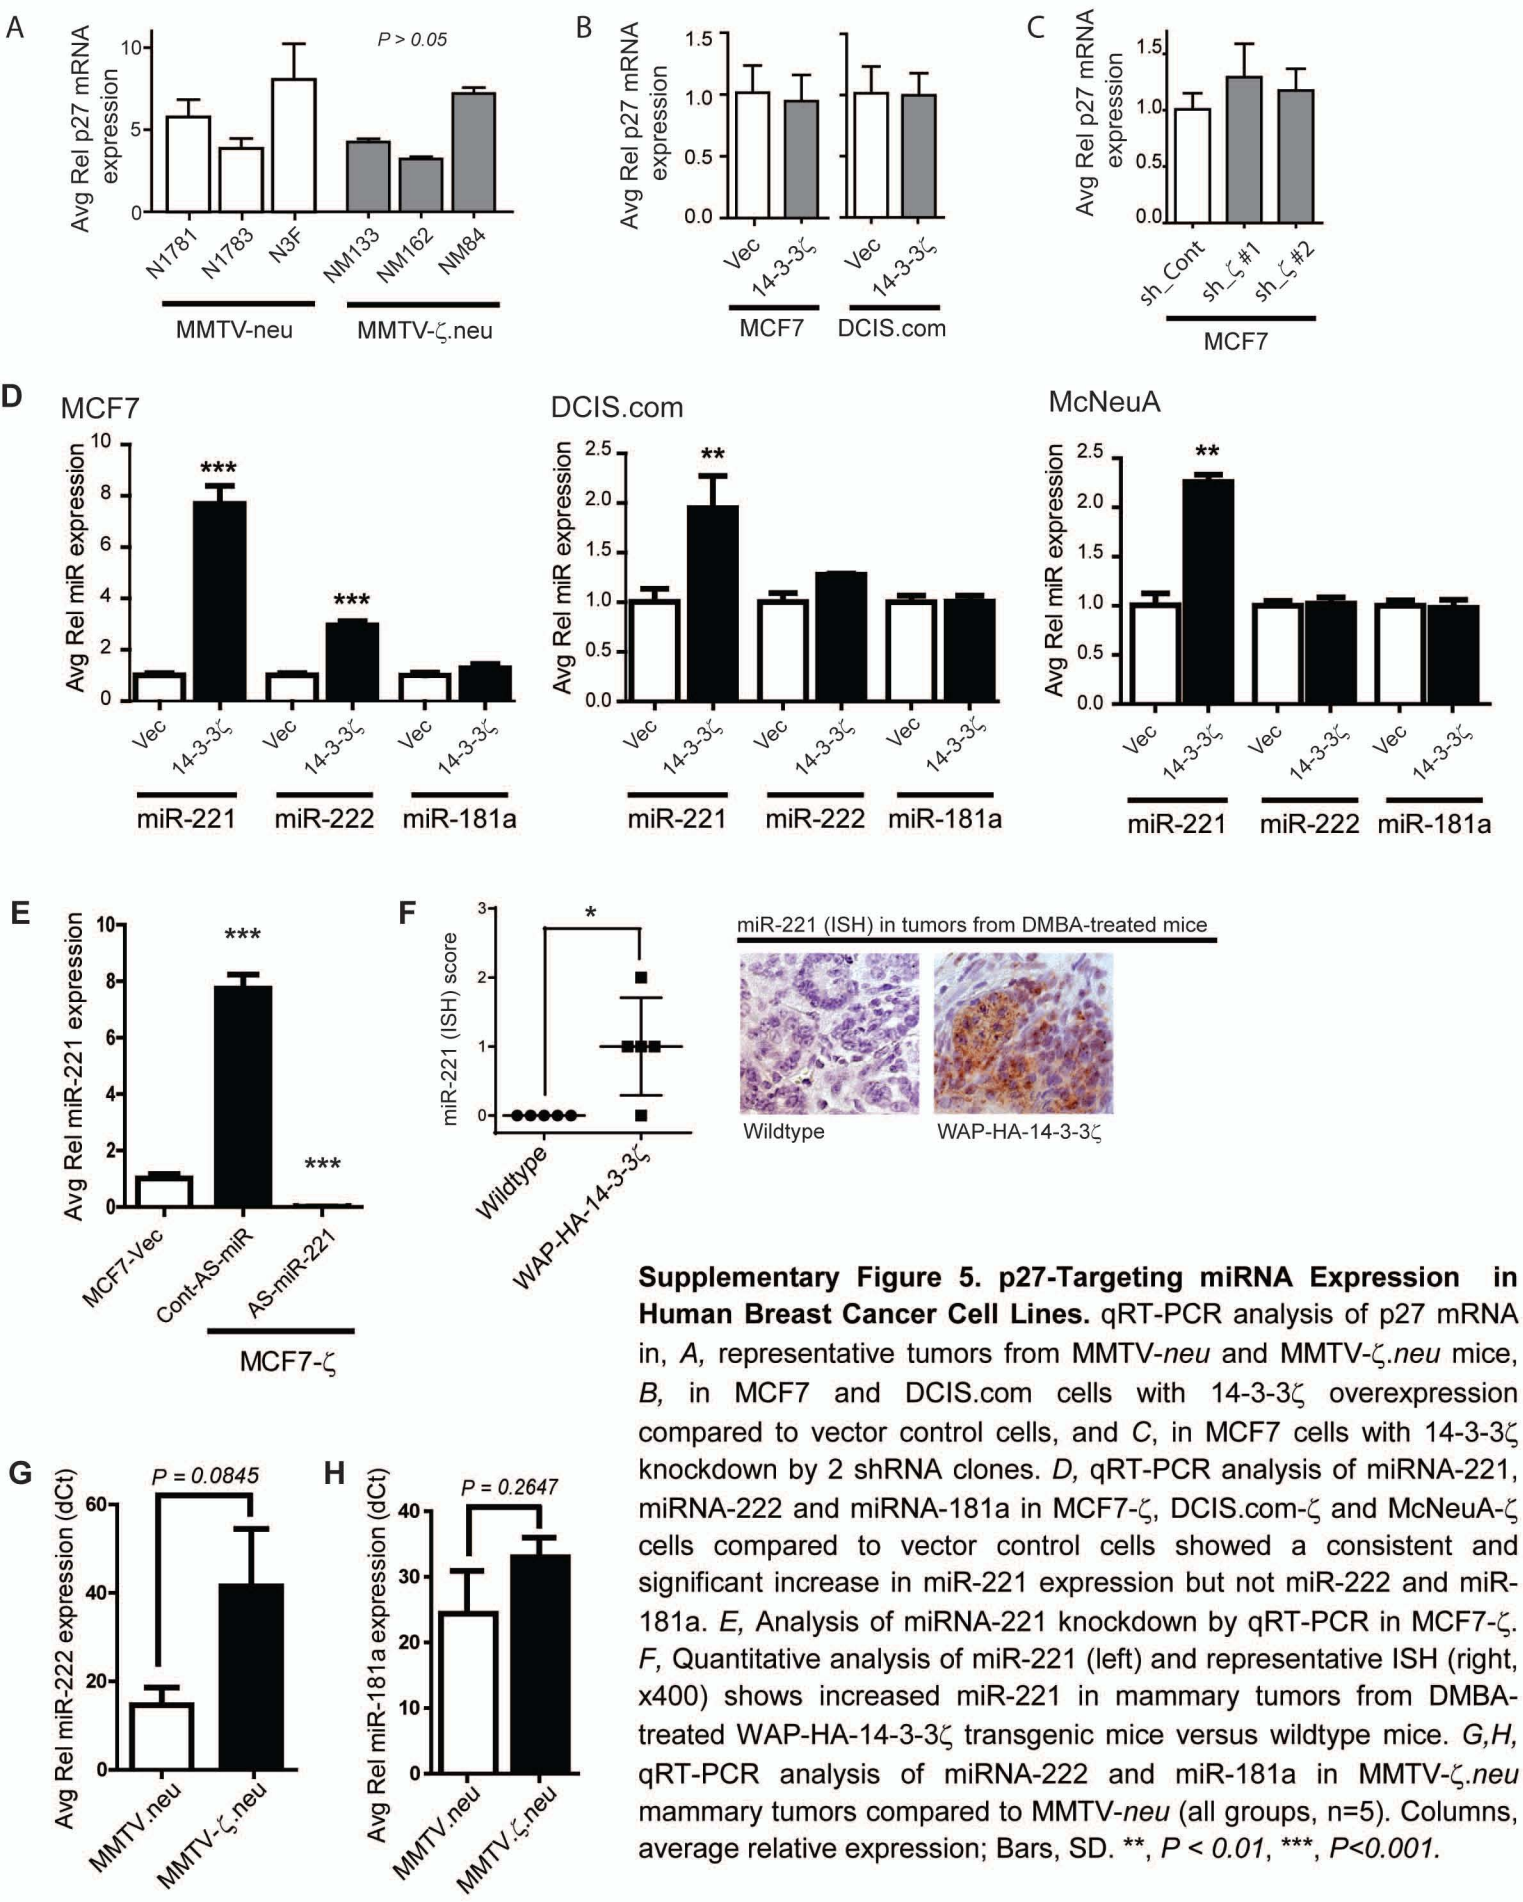

# Supplemental Figure 6

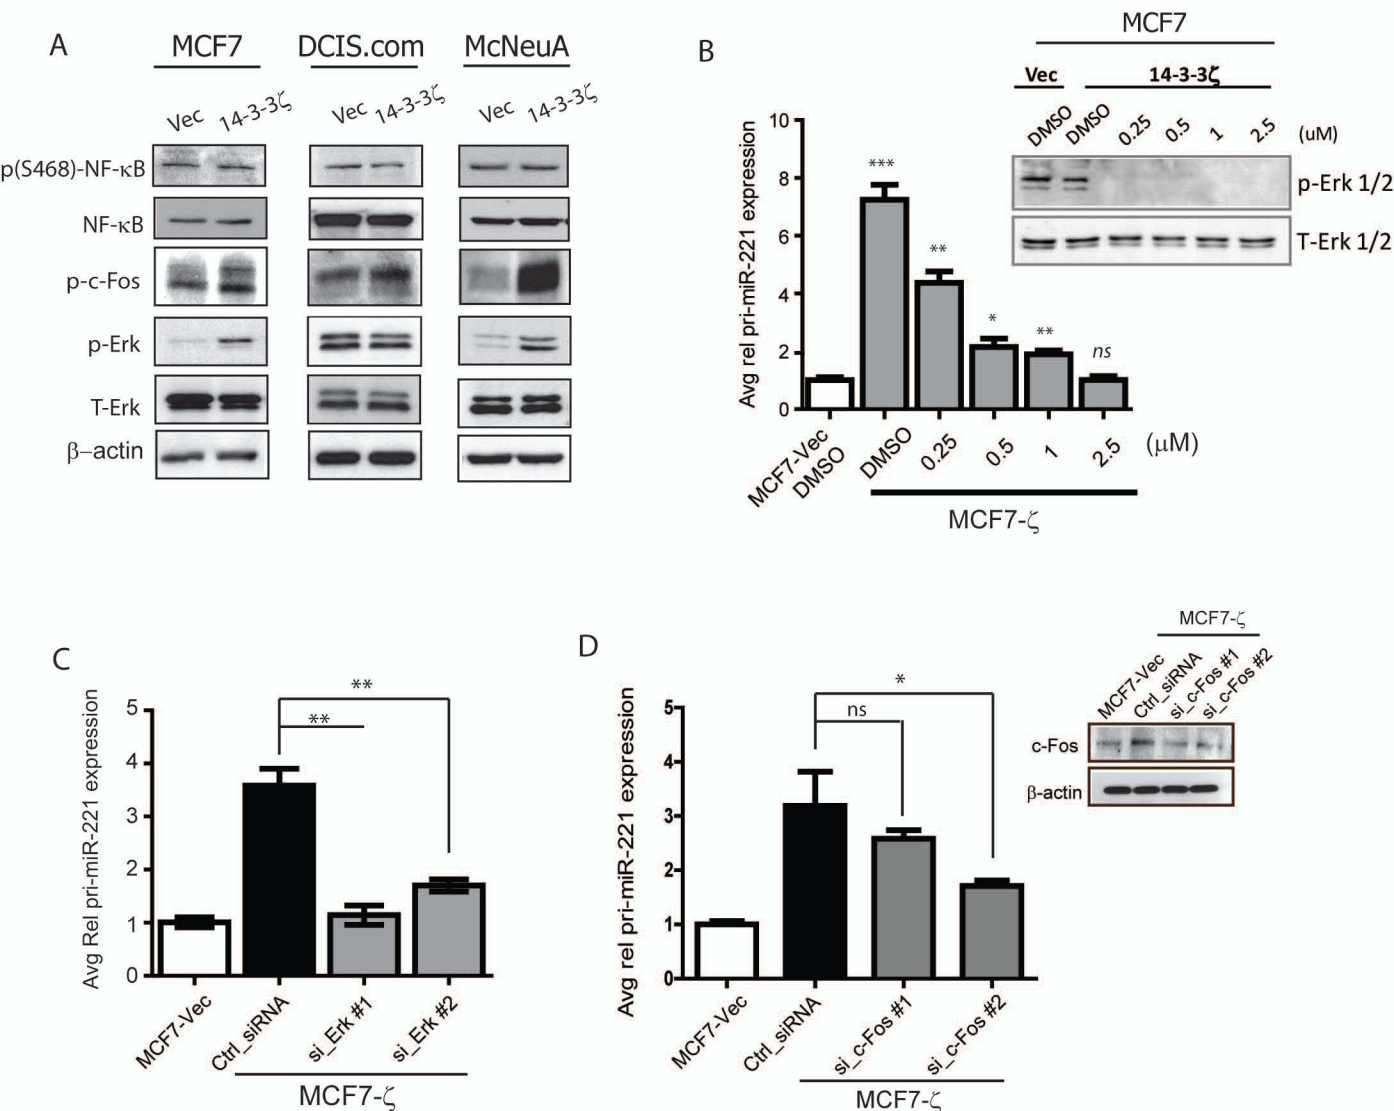

**Supplementary Figure 6. Analysis of Signaling Pathways Involved in 14-3-3 $\zeta$ -Mediated miR-221 Transcriptional Upregulation.** A, IB analysis of NF- $\kappa$ B and c-Fos signaling pathways in MCF7- $\zeta$ , DCIS.com- $\zeta$  and McNeuA- $\zeta$  cells compared to vector control cells revealed that NF- $\kappa$ B is not significantly altered and c-Fos is differentially regulated between the cell lines. B, Erk1/2 inhibition in MCF7- $\zeta$  cells by AZD6244 significantly decreased pri-miR-221 expression in a dose-dependent manner after 24 hours of treatment, relative to vector cells treated with DMSO (IB inset, Erk1/2 expression). C, Erk1/2 inhibition by two different siRNA in MCF7- $\zeta$  cells decreased pri-miR-221 expression by qRT-PCR. D, qRT-PCR analysis decreased pri-miR-221 expression with c-Fos knockdown using two different siRNAs (IB inset) in MCF7. Bars, SD. \*,  $P < 0.05$ , \*\*,  $P < 0.01$ , \*\*\*,  $P < 0.001$ .

## Supplementary Figure 7

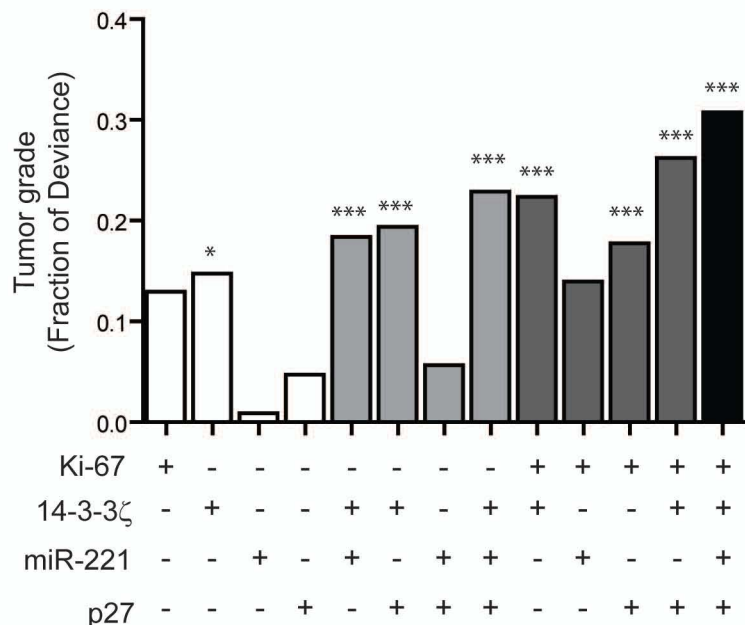

**Supplementary Figure 7:** Logistic regression model of 14-3-3 $\zeta$ /miR-221/p27/Ki-67 axis to predict tumor grade as a fraction of deviance using single marker, varying marker combinations, or the linear combination of all markers of the 14-3-3 $\zeta$ /miR-221/p27/Ki-67 axis.
